# Supplementary material
Source: PubMed Central journal article supplement (PMC3381351)
Supplement: NIHMS257752-supplement-01.pdf [file NIHMS257752-supplement-01.pdf]

**Supplementary Data** for “Modulus-Driven Differentiation of Marrow Stromal Cells in 3D Scaffolds Is Independent of Myosin-based Cytoskeletal Tension” by Parekh and Chatterjee *et al.*

**Figure S1**

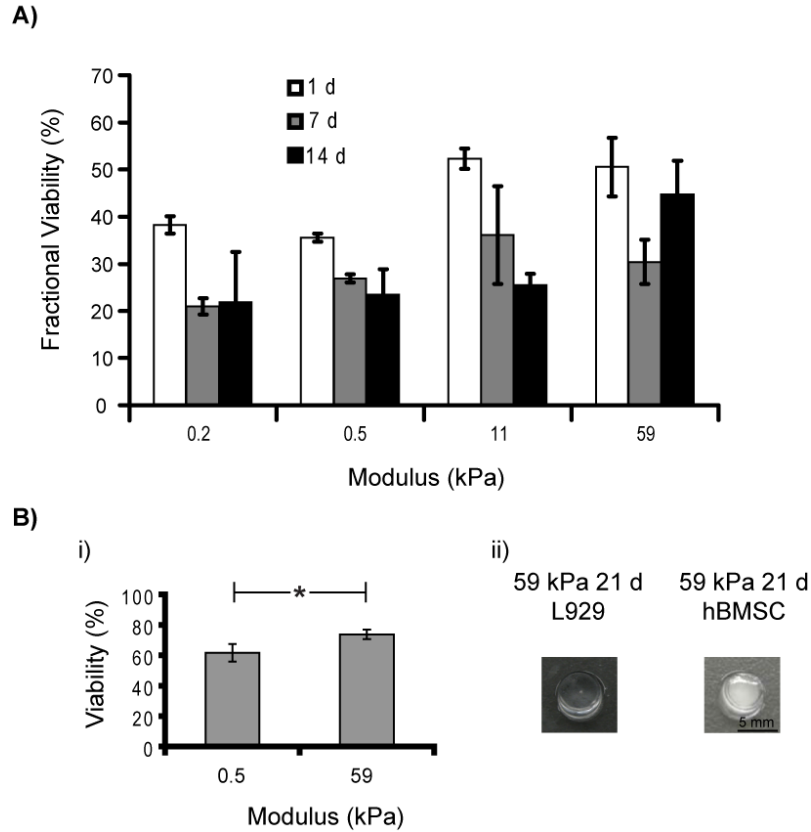

**Figure S1.** A) Fractional viability of hBMSCs in PEGTM hydrogels as a function of compressive modulus and time. Cell viability was determined by Live/Dead staining ( $n = 4$  per condition). B) i) Viability of L929 murine fibroblasts in both soft (0.5 kPa) and stiff (59 kPa) hydrogels ( $n = 3$ ). ii) Contrary to hBMSCs, 21 d culture of L929 cells in 59 kPa scaffolds did not lead to mineralization (no white deposits were visible).

**Figure S2**

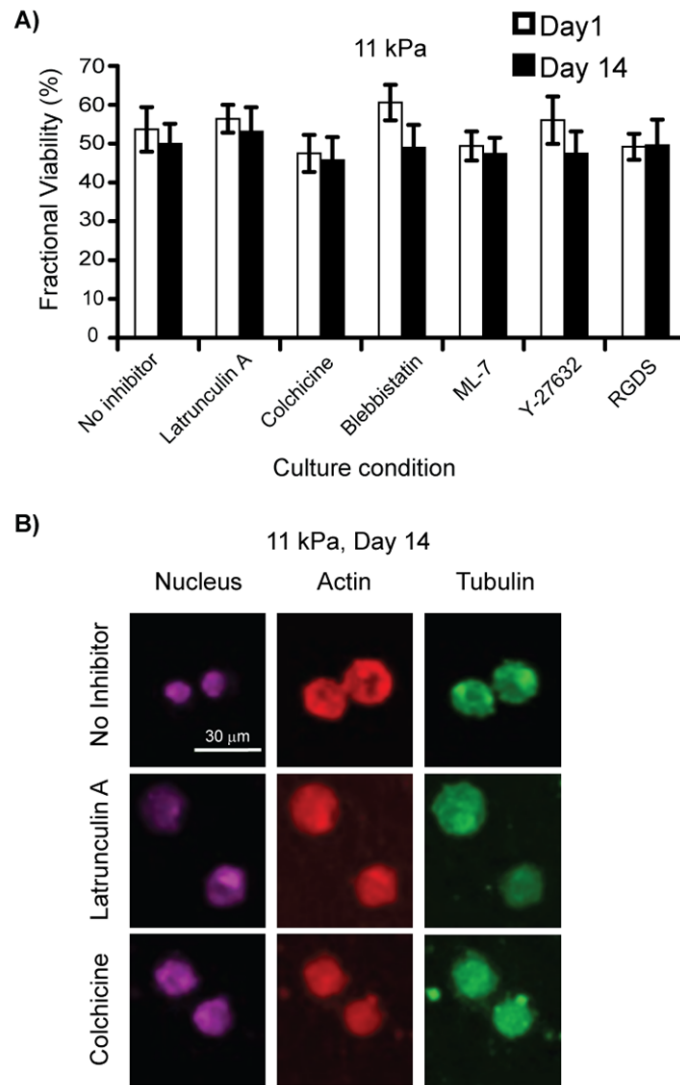

**Figure S2. A)** hBMSC viability was not affected by treatment with cytoskeletal inhibitors or RGDS peptide (11 kPa gels,  $n = 4$ ). No significant differences were observed for hBMSCs in scaffolds treated with actin, myosin, and microtubule inhibitors. **B)** Maximum intensity projections of confocal image stacks show that cell morphology in 3D scaffolds was not altered by cytoskeletal inhibition. hBMSCs cultured in both Latrunculin A and colchicine in 11 kPa scaffolds had morphology similar to cells cultured without inhibitors.
